# Supplementary material for: Prolactin-mediates a lactation-induced suppression of arcuate kisspeptin neuronal activity necessary for lactational infertility in mice
Source: eLife. 2025 Jan 17;13:RP94570. doi: 10.7554/eLife.94570 (PMC11741520; doi:10.7554/eLife.94570)
Supplement: Figure 1—source data 1. [file elife-94570-fig1-data1.xlsx]

## Sheet: Sheet1
Figure 1C
Animal ID	Group	Kisspeptin cell number
	Prlrlox/lox NL	55.75
	Prlrlox/lox NL	53
	Prlrlox/lox NL	17.83
	Prlrlox/lox NL	32.43
	Prlrlox/lox NL	30.6
	Prlrlox/lox NL	31.17
	Prlrlox/lox/Camk2aCre NL	32.4
	Prlrlox/lox/Camk2aCre NL	43
	Prlrlox/lox/Camk2aCre NL	41.333
	Prlrlox/lox/Camk2aCre NL	21.5
	Prlrlox/lox/Camk2aCre NL	23.2
	Prlrlox/lox Lactating	13.5
	Prlrlox/lox Lactating	18.57
	Prlrlox/lox Lactating	13.86
	Prlrlox/lox Lactating	13.8
	Prlrlox/lox Lactating	4.17
	Prlrlox/lox Lactating	4.29
	Prlrlox/lox Lactating	9.67
	Prlrlox/lox Lactating	16
	Prlrlox/lox/Camk2aCre Lactating	36.667
	Prlrlox/lox/Camk2aCre Lactating	23.333
	Prlrlox/lox/Camk2aCre Lactating	65.833
	Prlrlox/lox/Camk2aCre Lactating	50.6
	Prlrlox/lox/Camk2aCre Lactating	55.4
	Prlrlox/lox/Camk2aCre Lactating	14
	Prlrlox/lox/Camk2aCre Lactating	57
	Prlrlox/lox/Camk2aCre Lactating	27.5
Figure 1D
Animal ID	Group	Kisspeptin fibre density
26	Prlrlox/lox Lactating	2.2375
15	Prlrlox/lox Lactating	1.155
4	Prlrlox/lox Lactating	3.0883
9	Prlrlox/lox Lactating	2.2025
22	Prlrlox/lox Lactating	1.79
24	Prlrlox/lox Lactating	0.9016
25	Prlrlox/lox Lactating	2.0242
7	Prlrlox/lox Lactating	3.433
23	Prlrlox/lox/Camk2aCre Lactating	4.4425
46	Prlrlox/lox/Camk2aCre Lactating	3.3258
56	Prlrlox/lox/Camk2aCre Lactating	3.4917
1	Prlrlox/lox/Camk2aCre Lactating	3.5887
29	Prlrlox/lox/Camk2aCre Lactating	4.95
52	Prlrlox/lox/Camk2aCre Lactating	3.0358
10	Prlrlox/lox/Camk2aCre Lactating	3.8567
13	Prlrlox/lox/Camk2aCre Lactating	2.515
Figure 1E - Percentage showing estrous
Animal ID	Group	Day of lactation estrus first seen (control mice where perfused on roughly equivalent day of lactation (plus or minus 1 day) to act as day of lactation matched control for immunohistochemistry)
26	Prlrlox/lox Lactating - day of lactation matched control	No return by day 7 lactation
25	Prlrlox/lox Lactating - day of lactation matched control	No return by day 8 lactation
4	Prlrlox/lox Lactating - day of lactation matched control	No return by day 8 lactation
7	Prlrlox/lox Lactating - day of lactation matched control	No return by day 11 lactation
9	Prlrlox/lox Lactating - day of lactation matched control	No return by day 11 lactation
15	Prlrlox/lox Lactating - day of lactation matched control	No return by day 13 lactation
24	Prlrlox/lox Lactating - day of lactation matched control	No return by day 12 lactation
22	Prlrlox/lox Lactating - day of lactation matched control	No return by day 13 lactation
552	Prlrlox/lox Lactating	20
444	Prlrlox/lox Lactating	21
52	Prlrlox/lox/Camk2aCre Lactating	6
29	Prlrlox/lox/Camk2aCre Lactating	7
56	Prlrlox/lox/Camk2aCre Lactating	7
10	Prlrlox/lox/Camk2aCre Lactating	8
13	Prlrlox/lox/Camk2aCre Lactating	8
1	Prlrlox/lox/Camk2aCre Lactating	9
49	Prlrlox/lox/Camk2aCre Lactating	9
23	Prlrlox/lox/Camk2aCre Lactating	10
Figure 1-figure supplement 1B - RP3V
Animal ID	Group	Percent Kiss1 cells co-expressing Prlr
22159	Prlrlox/lox	72.3684
22170	Prlrlox/lox	44.8276
22318	Prlrlox/lox	64.5161
23076	Prlrlox/lox	55.8442
23210	Prlrlox/lox	47.619
185	Prlrlox/lox/Camk2aCre	9.30233
22283	Prlrlox/lox/Camk2aCre	16
22378	Prlrlox/lox/Camk2aCre	23.8532
23077	Prlrlox/lox/Camk2aCre	14.9254
23078	Prlrlox/lox/Camk2aCre	11.828
Figure 1-figure supplement 1D - ARC
Animal ID	Group	Percent Kiss1 cells co-expressing Prlr
183	Prlrlox/lox	84.6154
188	Prlrlox/lox	77.7778
23212	Prlrlox/lox	75.4717
23213	Prlrlox/lox	94.8718
181	Prlrlox/lox/Camk2aCre	27.5862
182	Prlrlox/lox/Camk2aCre	38.5965
184	Prlrlox/lox/Camk2aCre	17.4312
187	Prlrlox/lox/Camk2aCre	29.2683
22319	Prlrlox/lox/Camk2aCre	59.2105
Figure 1-figure supplement 2A
Animal ID	Group	Gestational weight gain (total grams) - day 1 pregnancy to day 18 pregnancy
	Prlrlox/lox	11
	Prlrlox/lox	9.8
	Prlrlox/lox	6.2
	Prlrlox/lox	8.1
	Prlrlox/lox	8.7
	Prlrlox/lox	11.4
	Prlrlox/lox	8.4
	Prlrlox/lox	9.2
	Prlrlox/lox	10.1
	Prlrlox/lox	4.8
	Prlrlox/lox	7.4
	Prlrlox/lox/Camk2aCre	9.5
	Prlrlox/lox/Camk2aCre	7.6
	Prlrlox/lox/Camk2aCre	4.9
	Prlrlox/lox/Camk2aCre	9.5
	Prlrlox/lox/Camk2aCre	9.7
	Prlrlox/lox/Camk2aCre	5.6
	Prlrlox/lox/Camk2aCre	5.5
	Prlrlox/lox/Camk2aCre	5.1
	Prlrlox/lox/Camk2aCre	7.1
	Prlrlox/lox/Camk2aCre	6.5
	Prlrlox/lox/Camk2aCre	9.5
Figure 1-figure supplement 2B
Animal ID	Group	Gestation length (days)
	Prlrlox/lox	20
	Prlrlox/lox	20
	Prlrlox/lox	19
	Prlrlox/lox	19
	Prlrlox/lox	19
	Prlrlox/lox	20
	Prlrlox/lox	19
	Prlrlox/lox	20
	Prlrlox/lox	20
	Prlrlox/lox	21
	Prlrlox/lox	20
	Prlrlox/lox/Camk2aCre	20
	Prlrlox/lox/Camk2aCre	20
	Prlrlox/lox/Camk2aCre	20
	Prlrlox/lox/Camk2aCre	20
	Prlrlox/lox/Camk2aCre	19
	Prlrlox/lox/Camk2aCre	20
	Prlrlox/lox/Camk2aCre	20
	Prlrlox/lox/Camk2aCre	21
	Prlrlox/lox/Camk2aCre	20
	Prlrlox/lox/Camk2aCre	20
	Prlrlox/lox/Camk2aCre	20
Figure 1-figure supplement 2C
Animal ID	Group	Number of live pups (day 3 lactation)
	Prlrlox/lox	0
	Prlrlox/lox	0
	Prlrlox/lox	0
	Prlrlox/lox	10
	Prlrlox/lox	7
	Prlrlox/lox	6
	Prlrlox/lox	9
	Prlrlox/lox	9
	Prlrlox/lox	10
	Prlrlox/lox	2
	Prlrlox/lox	4
	Prlrlox/lox/Camk2aCre	9
	Prlrlox/lox/Camk2aCre	0
	Prlrlox/lox/Camk2aCre	7
	Prlrlox/lox/Camk2aCre	0
	Prlrlox/lox/Camk2aCre	7
	Prlrlox/lox/Camk2aCre	3
	Prlrlox/lox/Camk2aCre	9
	Prlrlox/lox/Camk2aCre	0
	Prlrlox/lox/Camk2aCre	2
	Prlrlox/lox/Camk2aCre	8
	Prlrlox/lox/Camk2aCre	6
Figure 1-figure supplement 2D - litter weight gain		Day of lactation
Animal ID	Group	Day 3	Day 4	Day 5	Day 6	Day7	Day 8
	Prlrlox/lox	11.3	14.2	17.6	20.6	23.8	27.3
	Prlrlox/lox	10.1	12.4	14.8	18	20.7	23.7
	Prlrlox/lox	9.1	11.2	13.2	15.4	18.6	21.2
	Prlrlox/lox	10.9	14.5	17.7	21.1	24.4	28.2
	Prlrlox/lox	10.4	13.9	17.3	21.3	24.4	27.9
	Prlrlox/lox	10.1	13.8	16.8	20	22.6	25.4
	Prlrlox/lox	9.6	13.1	16.4	19.2	22.6
	Prlrlox/lox	8.5	9.1	9.7	10.6	12	13.3
	Prlrlox/lox/Camk2aCre	9.8	12.1	14.9	17.3	19	21.5
	Prlrlox/lox/Camk2aCre	9.3	11.2	13.2	15.5	17.6	20.4
	Prlrlox/lox/Camk2aCre	11.4	14.3	17.5	20.5	22.8	25.4
	Prlrlox/lox/Camk2aCre	8.5	10.8	13.2	16.5	17.9	20
	Prlrlox/lox/Camk2aCre	9.3	10.4	11.8	13.6	15.5	17.4
	Prlrlox/lox/Camk2aCre	9.7	13.8	16.4	19.8	22.2	25.8
	Prlrlox/lox/Camk2aCre	10.6	11.5	12.7	14.1	15.8	18.1
	Prlrlox/lox/Camk2aCre	9.9	13.6	16.1	19	22.5	25.8
