# Supplementary material for: Prolactin-mediates a lactation-induced suppression of arcuate kisspeptin neuronal activity necessary for lactational infertility in mice
Source: eLife. 2025 Jan 17;13:RP94570. doi: 10.7554/eLife.94570 (PMC11741520; doi:10.7554/eLife.94570)
Supplement: Figure 2—source data 1. [file elife-94570-fig2-data1.xlsx]

## Sheet: Sheet1
Figure 2A/Figure 2-figure supplement 1 - All LH data for all mice		LH (ng/ml); time of blood sampling (min)
Animal ID	Group	0	6	12	18	24	30	36	42	48	54	60	66	72	78	84	90	96	102	108	114	120	126	132	138	144	150	156	162	168	174
14833 (66)	Prlrlox/lox vehicle treated	0.0316	0.0517	0	0.0431	0.0319	0	0	0	0	0	0	0.0584	0	0.0133	0	0.0014	0	0	0	0	0	0	0	0	0	0.1322	0	0	0	0
14834 (73)	Prlrlox/lox vehicle treated	0	0	0	0.0845	0.0354	0	0	0	0	0	0	0	0	0	0	0	0	0.0755	0	0	0	0	0	0	0	0.0679	0	0	0.0194	0
14831 (69)	Prlrlox/lox vehicle treated	0	0	0	0.0314	0	0	0	0	0	0	0.1423	0.0845	0.3983	0.3621	0	0	0	0	0	0	0	0.1772	0	0	0	0	0	0.0074	0	0.1125
14313 (74)	Prlrlox/lox vehicle treated	0	0.3018	0	0	0.0137	0.0308	0	0.1073	0	0	0	0	0	0	0	0.1716	0	0	0	0	0.1681	0	0	0.0479	0	0	0	0	0	0.4888
17655 (84)	Prlrlox/lox vehicle treated	0	0	0	0	0	0	0	0	0	0	0	0	0	0	0	0	0	0	0	0	0	0	0	0	0	0	0	0.0875	0	0
17652 (86)	Prlrlox/lox vehicle treated	0.086	0.0677	0.0554	0.088	0.0906	0.0767	0.0504	0.0689	0.0816	0.0729	0.1071	0.1019	0.1251	0.0867	0.1101	0.0878	0.0607	0.0676	0.1235	0.0841	0.0911	0.1252	0.0714	0.0638	0.0759	0.121	0.1038	0.0818	0.0815	0.0976
14832 (68)	Prlrlox/lox vehicle treated	0.0355	0.0372	0.0107	0	0	0	0	0	0	0.0327	0.0583	0.0256	0	0	0	0.0047	0	0.0541	0	0	0	0	0	0.0484	0	0.0457	0	0	0	0
LLEP (77)	Prlrlox/lox vehicle treated	0	0	0	0	0	0	0.0569	0	0	0	0	0	0	0	0.0642	0.0096	0	0	0	0	0	0	0.0791	0	0	0	0	0	0	0
14315 (60)	Prlrlox/lox mifepristone treated	0	0	0	0	0	0	0	0	0	0	0	0	0	0	0	0	0	0	0	0	0	0	0	0	0	0	0	0	0	0
14324 (59)	Prlrlox/lox mifepristone treated	0	0	0	0	0	0	0	0	0	0	0	0	0	0	0	0	0	0	0	0	0	0	0	0	0	0	0	0	0	0
14323 (61)	Prlrlox/lox mifepristone treated	0	0	0	0	0.032	0	0	0	0	0	0	0	0.0987	0	0	0	0	0	0	0	0	0	0	0	0	0	0	0	0	0
17699 (87)	Prlrlox/lox mifepristone treated	0	0	0	0	0	0	0	0	0	0	0	0	0	0	0	0	0	0	0	0	0	0.8667	1.2489	0.6692	0.3591	0.2062	0.0968	0	0	0
17656 (83)	Prlrlox/lox mifepristone treated	0	0	0	0	0	0	0	0	0	0	0	0	0	0	0	0	0	0	0	0	0	0	0	0	0	0	0.0631	0.1756	0	0
17661 (78)	Prlrlox/lox mifepristone treated	0	0	0	0	0	0	0	0	0	0	0	0	0	0	0	0	0	0	0	0	0	0	0.1343	0	0	0	0	0	0	0
RREP (55)	Prlrlox/lox mifepristone treated	0	0	0	0	0	0	0	0	0	0	0	0	0	0	0	0	0	0	0	0	0	0	0	0	0	0	0	0	0	0
14352 (54)	Prlrlox/lox mifepristone treated	0	0	0	0	0	0	0	0	0.0299	0	0	0	0	0	0	0	0.0409	0	0	0	0	0	0	0	0	0	0	0	0	0
14383 (63)	Prlrlox/lox/Camk2aCre vehicle treated	0.1337	0.0322	0	0	0.0372	0.0754	0	0	0.0662	0.0146	0.6119	0.2656	0.1643	0.0798	0.0282	0	0	0	0	0	0	0	0	0	0.0437	0	0	0	0	0
19922 (90)	Prlrlox/lox/Camk2aCre vehicle treated	0	0.0996	0	0.1047	0.1505	0.0669	0	0.0621	0	0.113	0.0413	0.2198	0.708	0.9946	0.3802	0.2057	0.1659	0.0465	0.024	0.9342	0.4771	0.3937	0.16	0.0885	0.1071	0	0	0.6019	0.9018	0.5115
17700 (82)	Prlrlox/lox/Camk2aCre vehicle treated	0	0	0	0	0	0.028	0	0	0	0	0	0	0.1191	0	0	0	0	0	0	0	0.1666	0	0	0	0	0	0	0	0.1676	1.0406
14316 (71)	Prlrlox/lox/Camk2aCre vehicle treated	0.0839	0.2344	0.09	0.0899	0.0449	0.1529	0.0683	0.0744	0.1025	0.1204	0.1116	0.0908	0.0509	0.0768	0.0996	0.0704	0.1596	0.127	0.0931	0.0458	0.066	0.1085	0.107	0.1436	0.0966	0.0634	0.089	0.0419	0.032	0.0654
14390 (67)	Prlrlox/lox/Camk2aCre vehicle treated	0	0.0668	0	0.1995	0.1333	0.0743	0	0	0.0097	0	0.0253	0.0777	0.1235	0	0	0.0174	0	0	0	0	0	0	0	0	0	0	0	0	0	0
17663 (79)	Prlrlox/lox/Camk2aCre vehicle treated	0.167	0.0971	0	0	0	0	0.1665	0.0428	0	0	0	0	0	0.0524	0.2204	0.2655	0	0	0	0	0	0	0	0	0	0	0	0	0	0
19912 (89)	Prlrlox/lox/Camk2aCre vehicle treated	0.2841	0.2368	0.3468	0.4509	0.6663	0.3141	0.2947	0.1544	0.1867	0.3063	0.2456	0.3986	0.7797	0.3567	0.2536	0.2555	0.3252	0.2047	0.2993	0.3422	0.4582	0.4205	0.3499	0.2576	0.2993	0.2085	0.1634	0.5235	0.3157	0.5984
14311 (76)	Prlrlox/lox/Camk2aCre vehicle treated	0.1159	0.0716	0.2232	0.0747	0.1025	0.0847	0.0328	0.1805	0	0.1209	0.0489	0.0784	0.0172	0	0.1699	0.0284	0.0362	0.1111	0.12	0.0945	0.0914	0.01	0.1223	0.129	0.1128	0	0.0167	0.164	0	0.0491
14830 (58)	Prlrlox/lox/Camk2aCre mifepristone treated	0.1332	0.0853	0.0673	0.0985	0.0902	0.4028	0.3656	0.2068	0.2015	0.1981	0.1368	0.1312	0.1007	0.1779	0.2015	0.711	0.5557	0.3767	0.2522	0.2807	0.2272	0.263	0.4214	0.3418	0.3555	0.6796	0.6482	0.4126	0.3367	0.2134
14382 (62)	Prlrlox/lox/Camk2aCre mifepristone treated	0.1929	0.0507	0.071	0	0.0496	0	0.0323	0	0	0	0	0	0	0	0	1.0297	0.7253	0.3591	0.1985	0.1004	0.0358	0	0	0	0	0.2008	0.8662	0.4249	0.1976	0.147
17668 (81)	Prlrlox/lox/Camk2aCre mifepristone treated	0.0267	0.085	0.1889	0	0.0598	0.0507	0.2727	0.1707	0.0758	0	0	0.0127	0.1168	0.1163	0.0326	0.0465	0	0	0.0691	0	0.1056	0.1769	0.0942	0.0437	0.0472	0.0167	0	0	0	0.0785
17654 (85)	Prlrlox/lox/Camk2aCre mifepristone treated	0	0.0013	0	0	0	0	0	0	0	0	0	0	0	0	0	0	0	0	0	0	0	0	0	0	0	0	0.4305	0.3642	0.4683	0.3919
14353 (53)	Prlrlox/lox/Camk2aCre mifepristone treated	0	0.0151	0.1985	0.4938	0.3437	0	0	0	0	0	0	0.2273	0.233	0.0837	0	0	0	0	0	0.9352	0.0978	0.0102	0	0	0	0	0	0	0.07	0
14381 (64)	Prlrlox/lox/Camk2aCre mifepristone treated	0.1459	0.0517	0.1596	0	0	0.0709	0.0751	0.1333	0.0335	0.0234	0.0837	0.3238	0.9057	0.6326	0.3766	0.2708	0.174	0.1071	0.084	0.0531	0.007	0.0402	0.0829	0.1512	0.02	0.0495	0.0343	0.0129	0.0147	0.0757
14314 (72)	Prlrlox/lox/Camk2aCre mifepristone treated	0	0	0	0	0	0.0573	0.1188	0.1451	0.0106	0	0	0	0	0	0	0.0144	0	0	0	0	0	0	0	0	0.0534	0.1043	0	0	0	0
Figure 2B
Animal ID	Group	Pulse frequency
14833 (66)	Prlrlox/lox vehicle treated	0
14834 (73)	Prlrlox/lox vehicle treated	0
14831 (69)	Prlrlox/lox vehicle treated	2
14313 (74)	Prlrlox/lox vehicle treated	3
17655 (84)	Prlrlox/lox vehicle treated	0
17652 (86)	Prlrlox/lox vehicle treated	0
14832 (68)	Prlrlox/lox vehicle treated	0
LLEP (77)	Prlrlox/lox vehicle treated	0
14315 (60)	Prlrlox/lox mifepristone treated	0
14324 (59)	Prlrlox/lox mifepristone treated	0
14323 (61)	Prlrlox/lox mifepristone treated	0
17699 (87)	Prlrlox/lox mifepristone treated	1
17656 (83)	Prlrlox/lox mifepristone treated	0
17661 (78)	Prlrlox/lox mifepristone treated	0
RREP (55)	Prlrlox/lox mifepristone treated	0
14352 (54)	Prlrlox/lox mifepristone treated	0
14383 (63)	Prlrlox/lox/Camk2aCre vehicle treated	1
19922 (90)	Prlrlox/lox/Camk2aCre vehicle treated	3
17700 (82)	Prlrlox/lox/Camk2aCre vehicle treated	1
14316 (71)	Prlrlox/lox/Camk2aCre vehicle treated	1
14390 (67)	Prlrlox/lox/Camk2aCre vehicle treated	1
17663 (79)	Prlrlox/lox/Camk2aCre vehicle treated	1
19912 (89)	Prlrlox/lox/Camk2aCre vehicle treated	4
14311 (76)	Prlrlox/lox/Camk2aCre vehicle treated	0
14830 (58)	Prlrlox/lox/Camk2aCre mifepristone treated	3
14382 (62)	Prlrlox/lox/Camk2aCre mifepristone treated	3
17668 (81)	Prlrlox/lox/Camk2aCre mifepristone treated	2
17654 (85)	Prlrlox/lox/Camk2aCre mifepristone treated	1
14353 (53)	Prlrlox/lox/Camk2aCre mifepristone treated	3
14381 (64)	Prlrlox/lox/Camk2aCre mifepristone treated	1
14314 (72)	Prlrlox/lox/Camk2aCre mifepristone treated	0
Figure 2C
Animal ID	Group	Mean LH
14833 (66)	Prlrlox/lox vehicle treated	0.01212
14834 (73)	Prlrlox/lox vehicle treated	0.009423
14831 (69)	Prlrlox/lox vehicle treated	0.0571
14313 (74)	Prlrlox/lox vehicle treated	0.04433
17655 (84)	Prlrlox/lox vehicle treated	0.002917
17652 (86)	Prlrlox/lox vehicle treated	0.08686
14832 (68)	Prlrlox/lox vehicle treated	0.01176
LLEP (77)	Prlrlox/lox vehicle treated	0.006993
14315 (60)	Prlrlox/lox mifepristone treated	0
14324 (59)	Prlrlox/lox mifepristone treated	0
14323 (61)	Prlrlox/lox mifepristone treated	0.004357
17699 (87)	Prlrlox/lox mifepristone treated	0.1149
17656 (83)	Prlrlox/lox mifepristone treated	0.007957
17661 (78)	Prlrlox/lox mifepristone treated	0.004477
RREP (55)	Prlrlox/lox mifepristone treated	0
14352 (54)	Prlrlox/lox mifepristone treated	0.00236
14383 (63)	Prlrlox/lox/Camk2aCre vehicle treated	0.05176
19922 (90)	Prlrlox/lox/Camk2aCre vehicle treated	0.252
17700 (82)	Prlrlox/lox/Camk2aCre vehicle treated	0.05073
14316 (71)	Prlrlox/lox/Camk2aCre vehicle treated	0.09335
14390 (67)	Prlrlox/lox/Camk2aCre vehicle treated	0.02425
17663 (79)	Prlrlox/lox/Camk2aCre vehicle treated	0.03372
19912 (89)	Prlrlox/lox/Camk2aCre vehicle treated	0.3432
14311 (76)	Prlrlox/lox/Camk2aCre vehicle treated	0.08022
14830 (58)	Prlrlox/lox/Camk2aCre mifepristone treated	0.2891
14382 (62)	Prlrlox/lox/Camk2aCre mifepristone treated	0.1561
17668 (81)	Prlrlox/lox/Camk2aCre mifepristone treated	0.0629
17654 (85)	Prlrlox/lox/Camk2aCre mifepristone treated	0.05521
14353 (53)	Prlrlox/lox/Camk2aCre mifepristone treated	0.09028
14381 (64)	Prlrlox/lox/Camk2aCre mifepristone treated	0.1398
14314 (72)	Prlrlox/lox/Camk2aCre mifepristone treated	0.0168
Figure 2-figure supplement 2A mifepristone functional dose response trial
Gentoype	Treatment	Pregnant (yes/no)
C57BL/6J	Vehicle	yes
C57BL/6J	Vehicle	yes
C57BL/6J	Vehicle	yes
C57BL/6J	Vehicle	yes
C57BL/6J	Vehicle	no
C57BL/6J	Vehicle	no
C57BL/6J	4mg/kg mifepristone	no
C57BL/6J	4mg/kg mifepristone	no
C57BL/6J	4mg/kg mifepristone	no
C57BL/6J	4mg/kg mifepristone	no
C57BL/6J	4mg/kg mifepristone	no
C57BL/6J	4mg/kg mifepristone	no
Figure 2-figure supplement 2B		Total litter weight (g) from day 3-day 5 of lactation
Dam ID for litter	Group	Day 3	Day 4	Day 5
14833 (66)	Prlrlox/lox vehicle treated	7.9	9.5	11.4
14834 (73)	Prlrlox/lox vehicle treated	8.6	10.2	12.7
14831 (69)	Prlrlox/lox vehicle treated	8	10.1	12.5
14313 (74)	Prlrlox/lox vehicle treated	11.5	14.2	17.1
17655 (84)	Prlrlox/lox vehicle treated	9.1	12.3	14.8
17652 (86)	Prlrlox/lox vehicle treated	7.4	9.3	11.9
14832 (68)	Prlrlox/lox vehicle treated	9.1	10.8	13.6
14315 (60)	Prlrlox/lox mifepristone treated	8.3	10.1	12.6
14324 (59)	Prlrlox/lox mifepristone treated	8.7	11.2	14.1
14323 (61)	Prlrlox/lox mifepristone treated	8.1	10.5	13.4
17699 (87)	Prlrlox/lox mifepristone treated	8.5	10.9	13.3
17656 (83)	Prlrlox/lox mifepristone treated	9.2	11.7	14.6
17661 (78)	Prlrlox/lox mifepristone treated	7.5	8.9	11.1
RREP (55)	Prlrlox/lox mifepristone treated	7.4	8.9	11.2
14383 (63)	Prlrlox/lox/Camk2aCre vehicle treated	7.3	8.4	9.7
19922 (90)	Prlrlox/lox/Camk2aCre vehicle treated	8.9	10.9	13.6
17700 (82)	Prlrlox/lox/Camk2aCre vehicle treated	11.3	13.8	16.6
14316 (71)	Prlrlox/lox/Camk2aCre vehicle treated	8.1	9.1	11.1
19912 (89)	Prlrlox/lox/Camk2aCre vehicle treated	9.3	11.6	14.2
14311 (76)	Prlrlox/lox/Camk2aCre vehicle treated	8.1	9.5	11.5
14830 (58)	Prlrlox/lox/Camk2aCre mifepristone treated	9.2	11.4	13.9
14382 (62)	Prlrlox/lox/Camk2aCre mifepristone treated	8.4	10.8	13.5
17668 (81)	Prlrlox/lox/Camk2aCre mifepristone treated	8.9	11	13.2
17654 (85)	Prlrlox/lox/Camk2aCre mifepristone treated	9.1	11.2	14.1
14381 (64)	Prlrlox/lox/Camk2aCre mifepristone treated	8.4	9.7	11.8
14314 (72)	Prlrlox/lox/Camk2aCre mifepristone treated	6.1	8.1	9.1
