# Supplementary material for: Prolactin-mediates a lactation-induced suppression of arcuate kisspeptin neuronal activity necessary for lactational infertility in mice
Source: eLife. 2025 Jan 17;13:RP94570. doi: 10.7554/eLife.94570 (PMC11741520; doi:10.7554/eLife.94570)
Supplement: Figure 4—source data 1. [file elife-94570-fig4-data1.xlsx]

## Sheet: Sheet1
Figure 4B - SE frequency		Reproductive state (some data points are missing due to issues with recordings (e.g. dirty fibre optic cannula or system battery issues))
Animal ID	Group	NL	Day 4	Day 14	Day 18/19	Day 7	Day 14	Day 18	24h after weaning	Return to estrous cycles	OVX
F22	Kiss1Cre	2
F25	Kiss1Cre	1	0	0	5.64286	0	0.333333	1			5
F26	Kiss1Cre	2
F27	Kiss1Cre	0.5	0	0	1.21429	0	0.666667	0.75	1.625	2	5.33333
F29	Kiss1Cre	1.5	0.75	0		0					5.33333
F37	Kiss1Cre	2	0.5	0	1.714	0	0.666667	0.5	1.125	1	4.66667
F38	Kiss1Cre	0.5	0.5	0		0	0.666667	1	1.25	1.66667	4.33333
F40	Kiss1Cre	0.5	0	0	0.142857			1	1.5	2	4
Figure 4C - SE amplitude (relative)		Reproductive state (some data points are missing due to issues with recordings (e.g. dirty fibre optic cannula or system battery issues))
Animal ID	Group	NL	Day 4	Day 14	Day 18/19	Day 7	Day 14	Day 18	24h after weaning	Return to estrous cycles	OVX
F22	Kiss1Cre	0.276262
F25	Kiss1Cre	0.694222			0.0586484		0.240126	0.121428			0.544001
F26	Kiss1Cre	0.712834
F27	Kiss1Cre	1.24404			0.116838		0.310074	0.270106	0.331415	0.435207	1.44725
F29	Kiss1Cre	0.659357	1.02291							0.574322	1.05012
F37	Kiss1Cre	0.808691	0.472283		0.0715012		0.104066	0.149071	0.156479	0.175667	1.36761
F38	Kiss1Cre	0.498553	0.450354				0.191074	0.214726	0.237809	0.194408	0.331885
F40	Kiss1Cre	1.7134			0.237689			0.449265	0.222213	0.384589	0.972948
