# Supplementary material for: Prolactin-mediates a lactation-induced suppression of arcuate kisspeptin neuronal activity necessary for lactational infertility in mice
Source: eLife. 2025 Jan 17;13:RP94570. doi: 10.7554/eLife.94570 (PMC11741520; doi:10.7554/eLife.94570)
Supplement: Figure 5—source data 1. [file elife-94570-fig5-data1.xlsx]

## Sheet: Sheet1
Figure 5C - SE frequency		Reproductive state
Animal ID	Group	NL	D18/19 pregnancy
F25	Kiss1Cre	1	5.64286
F27	Kiss1Cre	0.5	1.21429
F37	Kiss1Cre	2	1.5897
F40	Kiss1Cre	0.5	0.150943
Figure 5C - SE amplitude (relative)		Reproductive state (an amplitude of 0 = no SE so these are excluded from analysis)
Animal ID	Group	NL	D18/19 pregnancy
F25	Kiss1Cre	0.694222	0.0586484
F27	Kiss1Cre	1.24404	0.116838
F37	Kiss1Cre	0.808691	0.0715012
F40	Kiss1Cre	1.7134	0.237689
