# Supplementary material for: Prolactin-mediates a lactation-induced suppression of arcuate kisspeptin neuronal activity necessary for lactational infertility in mice
Source: eLife. 2025 Jan 17;13:RP94570. doi: 10.7554/eLife.94570 (PMC11741520; doi:10.7554/eLife.94570)
Supplement: Figure 6—source data 1. [file elife-94570-fig6-data1.xlsx]

## Sheet: Sheet1
Figure 6A - Percentage showing estrous
Animal ID	Group	Day of lactation that estrus first seen
P7	Prlrlox/lox/Kiss1Cre	4
11	Prlrlox/lox/Kiss1Cre	6
14	Prlrlox/lox/Kiss1Cre	6
127	Prlrlox/lox/Kiss1Cre	7
128	Prlrlox/lox/Kiss1Cre	7
134	Prlrlox/lox/Kiss1Cre	7
142	Prlrlox/lox/Kiss1Cre	7
170	Prlrlox/lox/Kiss1Cre	7
172	Prlrlox/lox/Kiss1Cre	7
102	Prlrlox/lox/Kiss1Cre	7
105	Prlrlox/lox/Kiss1Cre	7
P7	Prlrlox/lox/Kiss1Cre	7
P11	Prlrlox/lox/Kiss1Cre	7
132	Prlrlox/lox/Kiss1Cre	8
19	Prlrlox/lox/Kiss1Cre	8
P15	Prlrlox/lox/Kiss1Cre	8
23	Prlrlox/lox/Kiss1Cre	9
139	Prlrlox/lox/Kiss1Cre	10
15	Prlrlox/lox/Kiss1Cre	10
15.1	Prlrlox/lox/Kiss1Cre	10
18	Prlrlox/lox/Kiss1Cre	11
171	Prlrlox/lox/Kiss1Cre	14
138	Prlrlox/lox/Kiss1Cre	16
4	Prlrlox/lox/Kiss1Cre	No return by day 16 lactation when this mouse was euthanised
8	Prlrlox/lox/Kiss1Cre	No return by day 16 lactation when this mouse was euthanised
9	Prlrlox/lox/Kiss1Cre	No return by day 16 lactation when this mouse was euthanised
16	Prlrlox/lox/Kiss1Cre	No return by day 16 lactation when this mouse was euthanised
22	Prlrlox/lox/Kiss1Cre	17
95	Prlrlox/lox/Kiss1Cre	19
93	Prlrlox/lox/Kiss1Cre	No return by day 20 lactation when this mouse was euthanised
96	Prlrlox/lox/Kiss1Cre	No return by day 20 lactation when this mouse was euthanised
P17	Prlrlox/lox/Kiss1Cre	23 (after weaning day 21)
91	Prlrlox/lox	No return by day 9 lactation when this mouse was euthanised as it acted as a day of lactation matched control
5	Prlrlox/lox	No return by day 9 lactation when this mouse was euthanised
97	Prlrlox/lox	No return by day 11 lactation when this mouse was euthanised as it acted as a day of lactation matched control
1	Prlrlox/lox	No return by day 16 lactation when this mouse was euthanised
2	Prlrlox/lox	No return by day 16 lactation when this mouse was euthanised
3	Prlrlox/lox	No return by day 16 lactation when this mouse was euthanised
14	Prlrlox/lox	No return by day 16 lactation when this mouse was euthanised
12	Prlrlox/lox	19
141	Prlrlox/lox	No return by day 19 lactation when this mouse was euthanised
101	Prlrlox/lox	No return by day 20 lactation when this mouse was euthanised
99	Prlrlox/lox	No return by day 20 lactation when this mouse was euthanised
100	Prlrlox/lox	No return by day 20 lactation when this mouse was euthanised
104	Prlrlox/lox	No return by day 20 lactation when this mouse was euthanised
94	Prlrlox/lox	No return by day 20 lactation when this mouse was euthanised
2	Prlrlox/lox	22 (after weaning day 21)
8	Prlrlox/lox	22 (after weaning day 21)
9	Prlrlox/lox	22 (after weaning day 21)
16	Prlrlox/lox	22 (after weaning day 21)
20	Prlrlox/lox	22 (after weaning day 21)
136	Prlrlox/lox	22 (after weaning day 21)
131	Prlrlox/lox	23 (after weaning day 21)
5	Prlrlox/lox	23 (after weaning day 21)
6	Prlrlox/lox	23 (after weaning day 21)
129	Prlrlox/lox	24 (after weaning day 21)
133	Prlrlox/lox	24 (after weaning day 21)
135	Prlrlox/lox	24 (after weaning day 21)
137	Prlrlox/lox	24 (after weaning day 21)
143	Prlrlox/lox	24 (after weaning day 21)
3	Prlrlox/lox	24 (after weaning day 21)
17	Prlrlox/lox	Did not return by day 24 when this mouse was euthanised
Figure 6-figure supplement 1B
Animal ID	Group	Percent Kiss1 cells co-expressing Prlr
129	Prlrlox/lox	86.3636
131	Prlrlox/lox	75
133	Prlrlox/lox	83.3333
135	Prlrlox/lox	95.6522
136	Prlrlox/lox	90
137	Prlrlox/lox	89.7436
127	Prlrlox/lox/Kiss1Cre	44.4444
128	Prlrlox/lox/Kiss1Cre	36.7647
132	Prlrlox/lox/Kiss1Cre	36.5854
134	Prlrlox/lox/Kiss1Cre	22.2222
138	Prlrlox/lox/Kiss1Cre	31.3043
139	Prlrlox/lox/Kiss1Cre	35.6725
171	Prlrlox/lox/Kiss1Cre	19.2308
Figure 6-figure supplement 1C		Percent Kiss1 cells co-expressing Prlr correlation with day estrus return during lactation
Animal ID	Group	Day of lactation estrus first seen	Percent Kiss1 cells co-expressing Prlr
127	Prlrlox/lox/Kiss1Cre	7	44.4444
128	Prlrlox/lox/Kiss1Cre	7	36.7647
134	Prlrlox/lox/Kiss1Cre	7	22.2222
132	Prlrlox/lox/Kiss1Cre	8	36.5854
139	Prlrlox/lox/Kiss1Cre	10	35.6725
171	Prlrlox/lox/Kiss1Cre	14	19.2308
138	Prlrlox/lox/Kiss1Cre	16	31.3043
Figure 6-figure supplement 2A
Animal ID	Group	Gestational weight gain (total grams) - day 1 pregnancy to day 18 pregnancy
2SS	Prlrlox/lox	10.2
8SS	Prlrlox/lox	13.8
5SS	Prlrlox/lox	10
9SS	Prlrlox/lox	9.2
3SS	Prlrlox/lox	11.1
12SS	Prlrlox/lox	8
16SS	Prlrlox/lox	13
20SS	Prlrlox/lox	13.3
6SS	Prlrlox/lox	14
17SS	Prlrlox/lox	12.5
129	Prlrlox/lox	17.1
131	Prlrlox/lox	15.6
133	Prlrlox/lox	14.1
135	Prlrlox/lox	16.7
136	Prlrlox/lox	14.1
137	Prlrlox/lox	13.1
140	Prlrlox/lox	6.8
141	Prlrlox/lox	19.8
143	Prlrlox/lox	16.6
101	Prlrlox/lox	17.5
99	Prlrlox/lox	16.4
100	Prlrlox/lox	16.4
104	Prlrlox/lox	11.6
94	Prlrlox/lox	14.2
97	Prlrlox/lox	15
91	Prlrlox/lox	11.3
1	Prlrlox/lox	13.5
2	Prlrlox/lox	16
3	Prlrlox/lox	12.4
5	Prlrlox/lox	14.9
14	Prlrlox/lox	14.3
11	Prlrlox/lox/Kiss1Cre	11.9
14	Prlrlox/lox/Kiss1Cre	11.8
15	Prlrlox/lox/Kiss1Cre	13.7
18	Prlrlox/lox/Kiss1Cre	12.4
22	Prlrlox/lox/Kiss1Cre	11.6
23	Prlrlox/lox/Kiss1Cre	12.3
19	Prlrlox/lox/Kiss1Cre	10.2
127	Prlrlox/lox/Kiss1Cre	16.7
128	Prlrlox/lox/Kiss1Cre	14.3
132	Prlrlox/lox/Kiss1Cre	18.6
134	Prlrlox/lox/Kiss1Cre	16.7
138	Prlrlox/lox/Kiss1Cre	14.1
139	Prlrlox/lox/Kiss1Cre	13.6
142	Prlrlox/lox/Kiss1Cre	18.2
170	Prlrlox/lox/Kiss1Cre	12.1
171	Prlrlox/lox/Kiss1Cre	14.3
172	Prlrlox/lox/Kiss1Cre	14.9
93	Prlrlox/lox/Kiss1Cre	11
96	Prlrlox/lox/Kiss1Cre	17.4
95	Prlrlox/lox/Kiss1Cre	14.8
102	Prlrlox/lox/Kiss1Cre	14.4
105	Prlrlox/lox/Kiss1Cre	13
4	Prlrlox/lox/Kiss1Cre	10.2
8	Prlrlox/lox/Kiss1Cre	13
9	Prlrlox/lox/Kiss1Cre	16.5
15	Prlrlox/lox/Kiss1Cre	13.1
16	Prlrlox/lox/Kiss1Cre	13.7
P6	Prlrlox/lox/Kiss1Cre	10.9
P7	Prlrlox/lox/Kiss1Cre	16
P11	Prlrlox/lox/Kiss1Cre	14.6
P15	Prlrlox/lox/Kiss1Cre	16.2
P17	Prlrlox/lox/Kiss1Cre	13.9
Figure 6-figure supplement 2B
Animal ID	Group	Gestation length (days)
2SS	Prlrlox/lox	19
8SS	Prlrlox/lox	19
5SS	Prlrlox/lox	20
9SS	Prlrlox/lox	20
3SS	Prlrlox/lox	20
12SS	Prlrlox/lox	21
16SS	Prlrlox/lox	20
20SS	Prlrlox/lox	20
6SS	Prlrlox/lox	20
17SS	Prlrlox/lox	20
129	Prlrlox/lox	21
131	Prlrlox/lox	21
133	Prlrlox/lox	20
135	Prlrlox/lox	20
136	Prlrlox/lox	20
137	Prlrlox/lox	19
140	Prlrlox/lox	22
141	Prlrlox/lox	19
143	Prlrlox/lox	20
101	Prlrlox/lox	19
99	Prlrlox/lox	20
100	Prlrlox/lox	19
104	Prlrlox/lox	20
94	Prlrlox/lox	20
97	Prlrlox/lox	20
91	Prlrlox/lox	20
1	Prlrlox/lox	20
2	Prlrlox/lox	19
3	Prlrlox/lox	20
5	Prlrlox/lox	20
14	Prlrlox/lox	20
11	Prlrlox/lox/Kiss1Cre	20
14	Prlrlox/lox/Kiss1Cre	21
15	Prlrlox/lox/Kiss1Cre	19
18	Prlrlox/lox/Kiss1Cre	20
22	Prlrlox/lox/Kiss1Cre	20
23	Prlrlox/lox/Kiss1Cre	20
19	Prlrlox/lox/Kiss1Cre	20
127	Prlrlox/lox/Kiss1Cre	20
128	Prlrlox/lox/Kiss1Cre	20
132	Prlrlox/lox/Kiss1Cre	19
134	Prlrlox/lox/Kiss1Cre	20
138	Prlrlox/lox/Kiss1Cre	20
139	Prlrlox/lox/Kiss1Cre	20
142	Prlrlox/lox/Kiss1Cre	21
170	Prlrlox/lox/Kiss1Cre	20
171	Prlrlox/lox/Kiss1Cre	20
172	Prlrlox/lox/Kiss1Cre	20
93	Prlrlox/lox/Kiss1Cre	20
96	Prlrlox/lox/Kiss1Cre	19
95	Prlrlox/lox/Kiss1Cre	19
102	Prlrlox/lox/Kiss1Cre	20
105	Prlrlox/lox/Kiss1Cre	21
4	Prlrlox/lox/Kiss1Cre	20
8	Prlrlox/lox/Kiss1Cre	20
9	Prlrlox/lox/Kiss1Cre	20
15	Prlrlox/lox/Kiss1Cre	19
16	Prlrlox/lox/Kiss1Cre	20
P6	Prlrlox/lox/Kiss1Cre	21
P7	Prlrlox/lox/Kiss1Cre	20
P11	Prlrlox/lox/Kiss1Cre	21
P15	Prlrlox/lox/Kiss1Cre	20
P17	Prlrlox/lox/Kiss1Cre	19
Figure 6-figure supplement 2C
Dam ID for litter	Group	Number of live pups (day 3 lactation)
2SS	Prlrlox/lox	5
8SS	Prlrlox/lox	8
5SS	Prlrlox/lox	5
9SS	Prlrlox/lox	5
3SS	Prlrlox/lox	5
12SS	Prlrlox/lox	3
16SS	Prlrlox/lox	6
20SS	Prlrlox/lox	10
6SS	Prlrlox/lox	8
17SS	Prlrlox/lox	9
129	Prlrlox/lox	8
131	Prlrlox/lox	8
133	Prlrlox/lox	8
135	Prlrlox/lox	8
136	Prlrlox/lox	6
137	Prlrlox/lox	6
140	Prlrlox/lox	0
141	Prlrlox/lox	9
143	Prlrlox/lox	9
101	Prlrlox/lox	9
99	Prlrlox/lox	4
100	Prlrlox/lox	7
104	Prlrlox/lox	6
94	Prlrlox/lox	5
97	Prlrlox/lox	8
91	Prlrlox/lox	6
1	Prlrlox/lox	2
2	Prlrlox/lox	8
3	Prlrlox/lox	6
5	Prlrlox/lox	9
14	Prlrlox/lox	4
11	Prlrlox/lox/Kiss1Cre	7
14	Prlrlox/lox/Kiss1Cre	6
15	Prlrlox/lox/Kiss1Cre	6
18	Prlrlox/lox/Kiss1Cre	8
22	Prlrlox/lox/Kiss1Cre	8
23	Prlrlox/lox/Kiss1Cre	8
19	Prlrlox/lox/Kiss1Cre	8
127	Prlrlox/lox/Kiss1Cre	7
128	Prlrlox/lox/Kiss1Cre	6
132	Prlrlox/lox/Kiss1Cre	8
134	Prlrlox/lox/Kiss1Cre	9
138	Prlrlox/lox/Kiss1Cre	6
139	Prlrlox/lox/Kiss1Cre	3
142	Prlrlox/lox/Kiss1Cre	8
170	Prlrlox/lox/Kiss1Cre	5
171	Prlrlox/lox/Kiss1Cre	8
172	Prlrlox/lox/Kiss1Cre	8
93	Prlrlox/lox/Kiss1Cre	4
96	Prlrlox/lox/Kiss1Cre	8
95	Prlrlox/lox/Kiss1Cre	6
102	Prlrlox/lox/Kiss1Cre	7
105	Prlrlox/lox/Kiss1Cre	9
4	Prlrlox/lox/Kiss1Cre	6
8	Prlrlox/lox/Kiss1Cre	6
9	Prlrlox/lox/Kiss1Cre	8
15	Prlrlox/lox/Kiss1Cre	6
16	Prlrlox/lox/Kiss1Cre	7
P6	Prlrlox/lox/Kiss1Cre	6
P7	Prlrlox/lox/Kiss1Cre	6
P11	Prlrlox/lox/Kiss1Cre	7
P15	Prlrlox/lox/Kiss1Cre	6
P17	Prlrlox/lox/Kiss1Cre	7
Figure 6-figure supplement 2D - litter weight gain (day 3 to day 20 lactation)		Day of lactation
Dam ID for litter	Group	Day 3	Day 4	Day 5	Day 6	Day7	Day 8	Day 9	Day 10	Day 11	Day 12	Day 13	Day 14	Day 15	Day 16	Day 17	Day 18	Day 19	Day 20
2SS	Prlrlox/lox	8.8	10.9	12.6	15.7	18.3	22.1	24.4	26.4	28.9	31.9	33.9	36.5	39	41.3	42.6	43.5	44.8	47
8SS	Prlrlox/lox	10.3	14.1	16.8	20.6	23.1	28.1	30.7	33.3	35.7	38.4	40.3	43	44.7	46.7	47.6	47.7	49.7	52.4
5SS	Prlrlox/lox	8.7	11.1	14.5	17.5	21.3	23.7	26.3	29.8	32.5	34.6	37	40.1	43.1	45	45.6	46.7	47.3	49
9SS	Prlrlox/lox	6.2	7.5	8.5	10.7	12.5	14.3	16.9	19.5	21.4	23.1	25.1	27.3	29	30.3	32.1	33.4	34.7	33.9
3SS	Prlrlox/lox	6.3	7.4	10	11.7	13.9	16.8	19.5	22.3	24	27	29.3	32.5	33.6	35.6	37.5	39.3	40.1	40.5
12SS	Prlrlox/lox	4.2	5.1	6.4	7.5	8.9	10.6	12.5	13.9	15.4	16.8	18.6	20.2	21.1	23.3	23.4	23.9	23.3	23.5
16SS	Prlrlox/lox	10.5	12.7	16.3	20.1	23.5	26.9	29.8	33.4	37.1	39.3	42.4	44.1	45.7	47.5	49	49.6	51.5	53.2
6SS	Prlrlox/lox	9.2	11.7	14.2	18.4	21.2	25	27	29.5	33.2	35.4	38.1	40.1	43	44.6	46.3	46.5	46.7	46.8
17SS	Prlrlox/lox	9.7	13.6	16.6	19	23.2	26.1	30.1	32.1	34.9	38.3	41.7	44.4	46.3	48.6	49.2	49.5	50.3	52
129	Prlrlox/lox	9.1	12.2	14.5	17.5	20.8	23.8	27.2	30	31.4	35.1	37.6	39.6	41.7	44.3	44.6	44.8	45.3	45.8
131	Prlrlox/lox	10.7	13.5	17.6	20.6	24.2	27.6	30.5	33.8	36.2	37.8	42.1	44.2	46.2	47	49.3	49.3	48.7	52.4
133	Prlrlox/lox	9.2	12.2	14.7	17.9	21.1	24.6	28	30.1	32.2	35.5	38	39.5	41.8	43.9	44	44.4	45	46.2
135	Prlrlox/lox	9.6	13.1	16.2	19.5	23.3	26.5	29.1	32.9	34.9	38.1	40.4	42.3	44	46.5	46.7	47.7	48.7	51.5
136	Prlrlox/lox	9.2	11.2	13.8	16.8	19.7	23	25.8	27.6	30.5	33.6	36.8	39.2	40.6	42.9	44.1	43.7	44.3	47.9
137	Prlrlox/lox	7	8.1	10.3	12.4	16	18.5	21.8	24.7	27	30.2	32.4	33.9	36.8	39	40	39.9	40.6	41.3
141	Prlrlox/lox	10	13.5	17.2	21.3	24.9	27.2	30.8	34.2	37.2	40	42.8	45.1	47.7	49.4	50.5	51	53.4	55.4
143	Prlrlox/lox	7.6	9.7	12.3	15.4	18.5	22.2	24	27.4	31.4	34.2	37.2	39.3	42.2	43.8	45.5	46	47.5	47.5
101	Prlrlox/lox	9.1	11.5	15.1	18.6	21.4	24.6	28	30.8	33.6	35.9	39.3	41.8	44.3	47	48.2	48.9	50	50.8
99	Prlrlox/lox	7.1	9.1	11.6	13.2	15.8	28.6	21.6	23.9	25	29.1	31.9	33.9	38	39	40.5	41.2	41.9	43.1
100	Prlrlox/lox	10	12.8	16.3	18.3	21.6	25	27.9	31.1	33.8	36.5	39	41.3	44.5	44.9	45.3	47	48.3	50.7
104	Prlrlox/lox	8.8	10.3	12.7	15.1	18.4	21.5	24.4	26.8	29.1	31.6	33.5	35.6	38.5	39.2	40.8	41.8	41.3	42.2
94	Prlrlox/lox	8.4	9.7	10.9	11.8	13.4	14.9	16.2	18.1	19.8	22.2	25.5	26.8	29.3	31.7	32.9	34.3	35.6	35.7
14	Prlrlox/lox/Kiss1Cre	11.2	14.1	16.7	20.3	22.9	25	28.2	31.1	33.4	36.6	39.7	42.7	44.8	46	47.1	47.7	49.8	51.2
15	Prlrlox/lox/Kiss1Cre	9.5	11.7	14.5	17.5	20.2	22.6	25.3	28.7	30.7	32.8	36	37.6	39.8	40.4	40.9	41	39.9	41.2
18	Prlrlox/lox/Kiss1Cre	9.6	12.5	16.1	19.8	23.4	26.1	29.2	32.7	35	37.2	39.1	40.9	42.5	31.9	40.1	44.3	46	48.6
22	Prlrlox/lox/Kiss1Cre	10	12.4	14.7	17.6	21.1	23.4	26.2	24	31.8	34.1	36.3	39.2	40.2	41.6	42.2	42.1	43.9	47.4
23	Prlrlox/lox/Kiss1Cre	8.4	10.8	12.4	15.5	18.4	21.4	24.4	26.8	30.1	32.8	35	36.8	39.1	41.7	42.7	3.3	43.5	44.3
19	Prlrlox/lox/Kiss1Cre	12.2	15.5	17.6	21.2	25.3	27.5	31.7	33.9	37.6	40.6	42.3	43.4	45.9	47.9	48.3	49.6	51.1	56.2
127	Prlrlox/lox/Kiss1Cre	9.7	12.7	14.8	17.9	20.2	23.9	26.9	29.6	31.8	35.1	37.7	39.9	41.5	44.2	44.1	45.1	45.7	47.7
128	Prlrlox/lox/Kiss1Cre	10.3	12.2	14	17	19.7	22.7	25.3	27.6	30.5	37.5	34.9	37.7	40.6	41.1	42.2	43.3	44	45.1
132	Prlrlox/lox/Kiss1Cre	10.3	13	15.6	19.1	23	24.8	28.5	31.6	33.6	36.3	38.8	40.5	42.8	44.3	44.9	44	43.7	45.1
134	Prlrlox/lox/Kiss1Cre	9.4	11.4	14.5	17.4	20.4	24.3	27.1	30.1	32.9	35.1	38.1	41	43.4	45.1	47	47.8	47.6	49.4
138	Prlrlox/lox/Kiss1Cre	9.6	11	13.7	15.7	18.4	21.3	23.9	26.5	28.6	31	33.2	35.1	36.9	37.7	37.2	38	37.9	38.8
139	Prlrlox/lox/Kiss1Cre	4.1	5.8	9.1	9.4	9.7	10.6	11.9	13.6	15.2	16.9	18.7	20.7	22.8	24.4	25.9	27.3	28.9	28.9
142	Prlrlox/lox/Kiss1Cre	12.5	15.4	19	22.9	26.2	29.6	31.9	31.4	38.6	40.8	43.8	44.7	45.9	46.3	45.8	45.8	48.9	53.2
170	Prlrlox/lox/Kiss1Cre	8	9.7	14.2	16	18.6	21.3	23.4	26.6	28.8	31.7	33	35.4	36.4	38.2	39.6	40	40	41.1
171	Prlrlox/lox/Kiss1Cre	9.6	12.1	14.9	17.7	21	24.3	27.5	29.8	32.5	34.9	36.9	38.4	40.1	41	41.1	41.1	41.9	42.5
172	Prlrlox/lox/Kiss1Cre	10.4	12.8	16	18.7	21.5	24.4	26.9	30.5	32.6	35.5	39	41.1	42.6	44.2	45.4	44.9	45.5	47.2
93	Prlrlox/lox/Kiss1Cre	8.1	8.1	9.1	10.8	12.7	15.1	16.9	19.3	21.8	23.7	25.4	27.6	29.5	32.1	32.9	34.6	35	35.1
96	Prlrlox/lox/Kiss1Cre	8.9	11.1	13.8	17.1	20.8	23.6	27.2	30.3	32.6	36	38.6	41.1	43.9	46.9	47.6	48	48.4	53.4
95	Prlrlox/lox/Kiss1Cre	9.1	11.2	13.3	15.5	19	22.1	25.4	28.3	31.1	34.3	36.4	39.4	41.1	43.9	44	43.6	43.3	43.3
	Prlrlox/lox/Kiss1Cre	9.7	12	15.5	18.4	20	23.1	26.3	29.7	31.7	33.9	37.6	39.6	43	44.4	46.5	47.7	48.3	50
P6	Prlrlox/lox/Kiss1Cre	8.6	10.9	12.4	14.7	17.1	19.4	22.1	24.8	27.5	30.2	32.5	34.3	37	38.9	40.5	41.5	41.7	43.7
P7	Prlrlox/lox/Kiss1Cre	8.1	9.9	12.2	14.5	17.3	20.1	22.5	26	28.9	32.1	35	38.3	40.5	42.5	44.1	44.8	46	47.9
P11	Prlrlox/lox/Kiss1Cre	11	12.4	14.8	17.3	20.9	24	27.4	31	33.7	37.2	40.9	43.7	45.5	47.3	48.8	50.2	52.2	55.9
P15	Prlrlox/lox/Kiss1Cre	9.6	11.6	14.3	16.4	19.1	21.9	24.8	28.1	31.1	33.3	36.1	38.8	41.1	43.5	44	45.5	46.1	48.3
P17	Prlrlox/lox/Kiss1Cre	9.6	10.4	12.4	14.6	17.2	19.9	22.6	26	29.4	31.6	34.8	37.3	40.5	42.2	43.9	44.5	44.5	46.4
